# Supplementary material for: Effects of Neddylation and mTOR Inhibition in Acute Myelogenous Leukemia
Source: PubMed Central journal article supplement — Transl Oncol. 2019 Jan 27;12(4):602–13. doi: 10.1016/j.tranon.2019.01.001 (PMC6348338; doi:10.1016/j.tranon.2019.01.001), 2019-01-27

# **Supplementary Material**

# Table1. Antibodies used in this study

| Antibody                          | Host   | Species against | Source         | Catalog number |
|-----------------------------------|--------|-----------------|----------------|----------------|
| mTOR                              | rabbit | human           | cell signaling | 2972           |
| p-mTOR (S2448) D9C2               | rabbit | human           | cell signaling | 5536           |
| p-mTOR (S2481)                    | rabbit | human           | cell signaling | 2974           |
| pAKT (S473) D9E                   | rabbit | human           | cell signaling | 4060           |
| p4E-BP1 (S65)174A9                | rabbit | human           | cell signaling | 9456           |
| p-S6 Ribosomal Protein (S240/244) | rabbit | human           | cell signaling | 2215           |
| Deptor                            | rabbit | human           | cell signaling | 11816          |
| pNFκB P65 (S536)                  | rabbit | human           | cell signaling | 3033           |
| pIκBα (S32) 14D4                  | rabbit | human           | cell signaling | 2859           |
| IκBα (C21)                        | rabbit | human           | Santa Cruz     | Sc-371         |
| NEDD8 (19E3)                      | rabbit | human           | cell signaling | 2754           |
| XIAP (3B6)                        | rabbit | human           | cell signaling | 2045           |
| BCI-XL (54H6)                     | rabbit | human           | cell signaling | 2764           |
| BID                               | rabbit | human           | cell signaling | 2002           |
| Caspase 3 (8G10)                  | rabbit | human           | cell signaling | 9665           |
| Caspase 8 (1C12)                  | mouse  | human           | cell signaling | 9746           |
| Caspase 7 (C7)                    | mouse  | human           | cell signaling | 9494           |
| pH2A.X (S139) JBW301              | mouse  | human           | Millipore      | 05-636         |
| CDT-1 (D10F11)                    | rabbit | human           | cell signaling | 8064           |
| cleaved PARP (D214) 19F4          | mouse  | human           | cell signaling | 9546           |
| FITC conjugated CD11b (ICRF44)    | mouse  | human           | BD             | 562793         |
| CD11c APC                         | mouse  | human           | BD Pharmingen  | 559677         |
| CD36 APC                          | mouse  | human           | BD Bioscience  | 550856         |
| GAPDH                             | mouse  | human           | Ambion         | Am4300         |

Table 2. Characteristics of Primary AML Cases Utilized

| Case | Age | Gender | WBC  | Cytogenetics | NPM1/FLT3 | 2 <sup>o</sup> |
|------|-----|--------|------|--------------|-----------|----------------|
| 1    | 73  | F      | 237  | Normal       | M/+       | No             |
| 2    | 60  | M      | 142  | Normal       | M/+       | No             |
| 3    | 61  | M      | 441  | N/A          | N/A       | No             |
| 4    | 56  | F      | 10   | Normal       | M/N       | Yes            |
| 5    | 67  | M      | 72   | -5           | N/A       | Yes            |
| 6    | N/A | N/A    | N/A  | N/A          | N/A       | N/A            |
| 7    | N/A | N/A    | N/A  | N/A          | N/A       | N/A            |
| 8    | 58  | M      | 101  | Inv3, 7q31   | U/N       | No             |
| 9    | 64  | M      | N/A  | N/A          | N/A       | N/A            |
| 10   | 60  | M      | 439K | +8           | M/N       | No             |
| 11   | 46  | F      | 122  | t(11;17)     | U/N       | No             |

Key: F=Female; M=Male; WBC=white blood count X 10(-3)/uL; Normal 46(X;X) or 46(X;Y); NPM1 (nucleophosmin) FLT3= fms-like tyrosine kinase -1 ITD (internal tandem repeat); 2<sup>o</sup>= secondary to underlying malignancy or prior myelodysplastic syndrome. N/A=not available, U=Unmutated, N=negative.

**Figure S1. mTOR inhibitor S attenuated neddylation inhibitor P induced cytotoxicity in several AML cell lines.** HL-60, KG1a, Molm-13 or THP-1 were treated with different concentrations of P with or without S for 48hours. The cell viability was determined by trypan blue staining. Live cell (trypan blue negative) and total cell number were counted by a cell counter. The cell viability was calculated by live cell number divided by total cell number times 100.

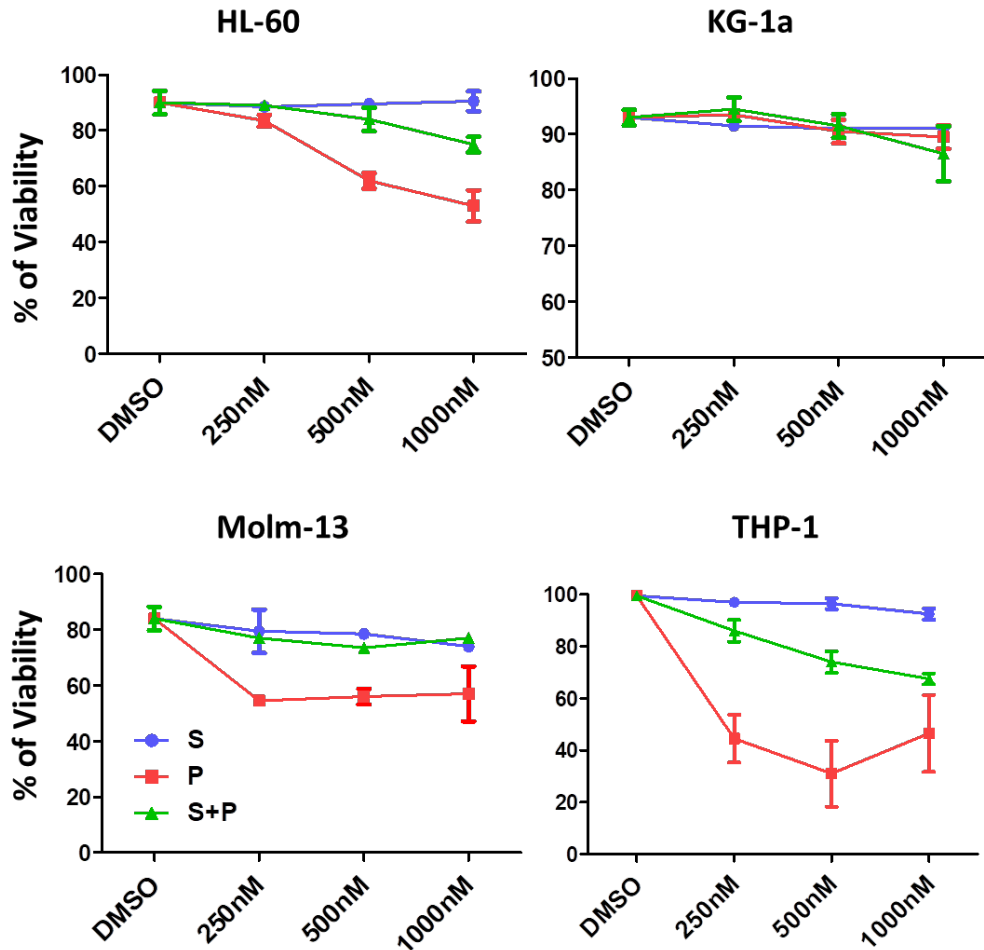

**Figure S2. Effects of S, P, or the combination on primary AML blast viability.** Primary AML blasts from apheresis samples were grown in RPMI with 10% FBS and then exposed to DMSO control, 400 nM P, 400 nM S, or the Combination (S+P) for 24 or 48 hours. Viability was assessed by Annexin V/7AAD flow cytometry analysis as described.

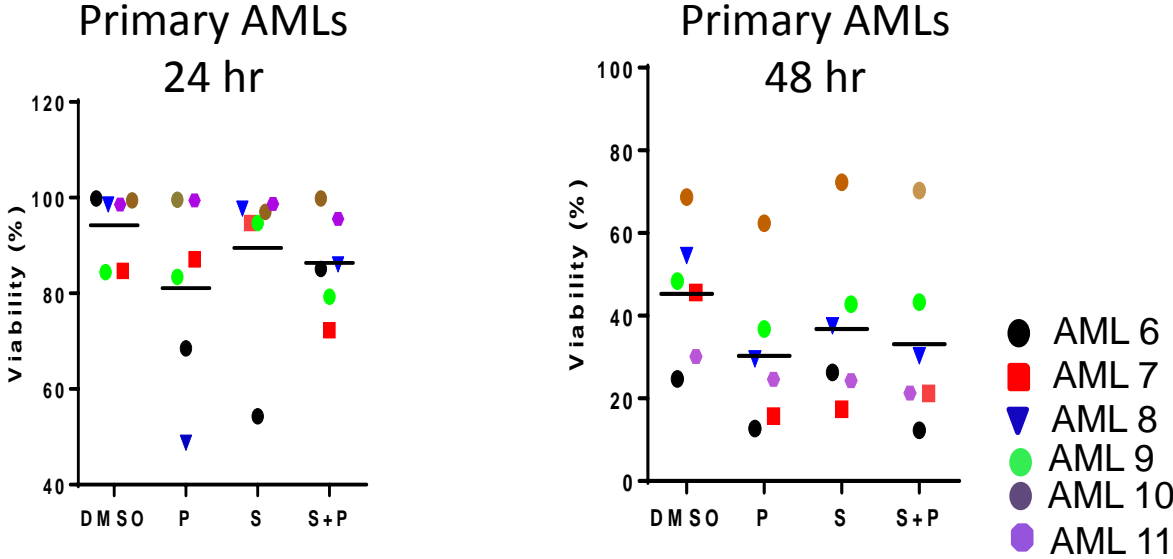

**Figure S3. Expression of CD11c and CD36 on AML cell lines in response to P or S after a 24 hour exposure. Both drugs were used at a concentration of 400 nM. FMO=fluorescence marker only.**

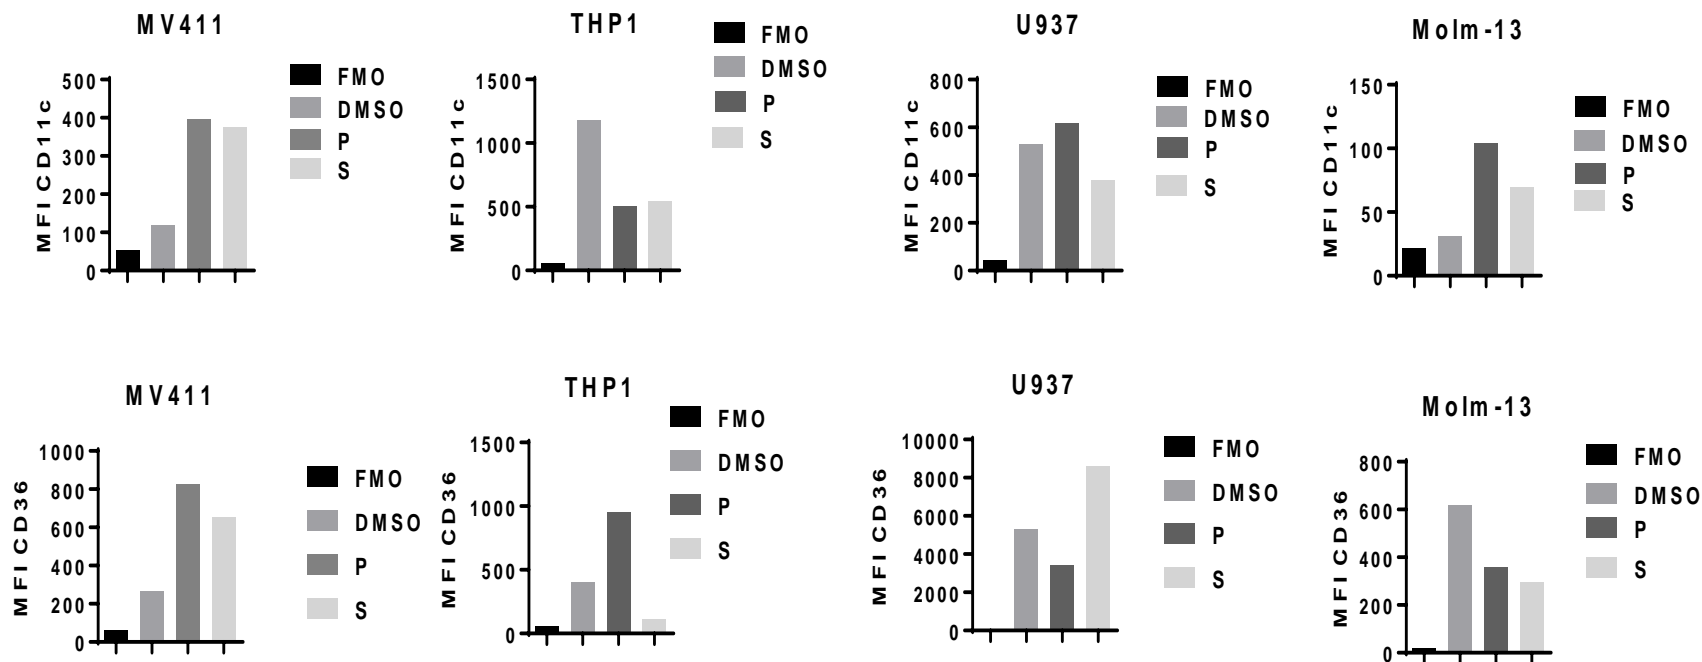

Figure S4. S significantly reduced AML cell protein levels. MV4-11 and Molm-13 were treated with 500nM S or P for 1 or 2 days, cell lysate protein levels were determined. \*P<0.05, \*\*P<0.01 compared to DMSO day1 control; ^^P<0.01, ^^P<0.001 compared to DMSO day2 control.

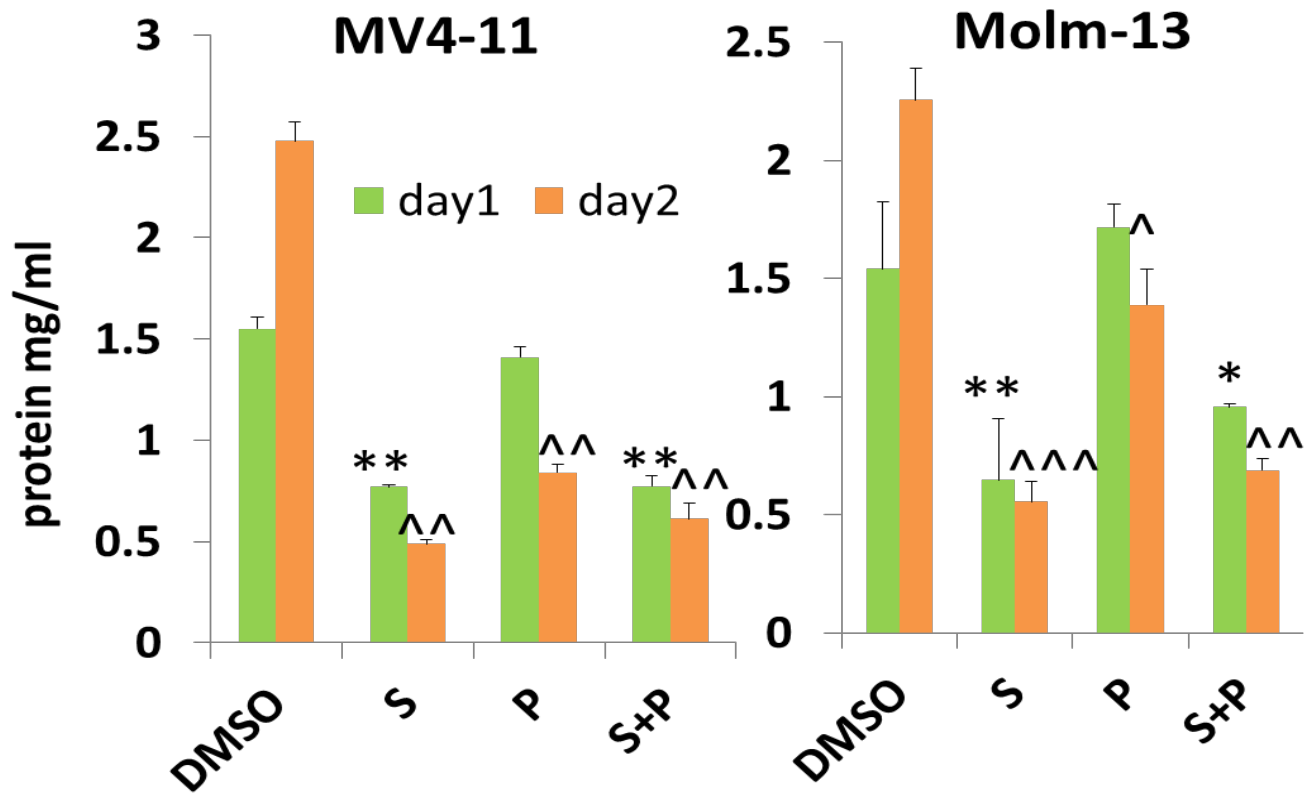

Figure S5. **mTOR shRNA decreased AML cell size.** Molm-13 cells were infected with scramble (SC) or mTOR shRNAs for 7days. Cell size was determined by flow cytometry using FSC-A parameter. \*P<0.05, \*\*P<0.01 compared to SC shRNA using student t-test.

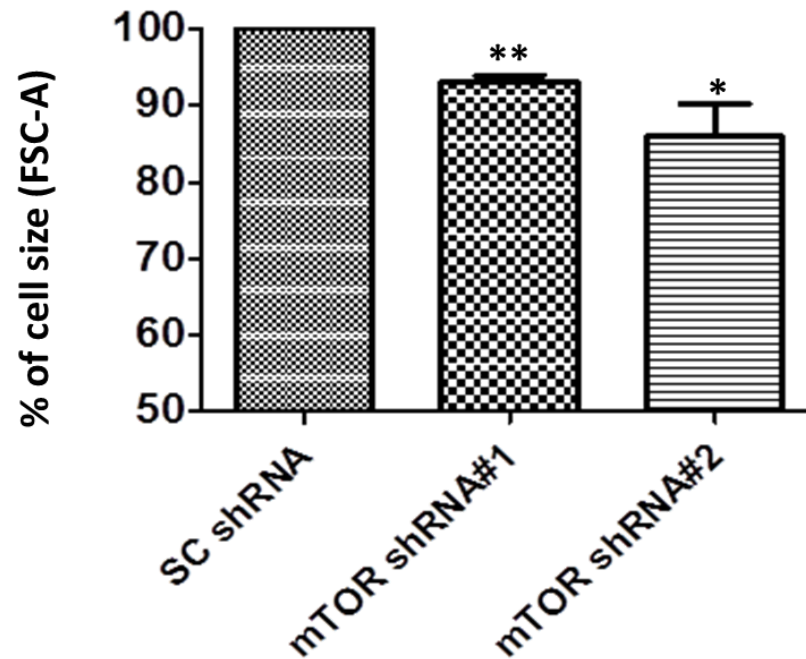



Figure S6. **mTORC1 inhibitor Rapamycin did not attenuate P induced cytotoxicity.** Molm-13 or MV4-11 cells were treated with 400nM P with or without rapamycin for 48hours. The percentage of live, apoptotic and dead cell was determined by flow cytometry annexinV apoptosis assay. Cell size was determined using FSC-A parameter.

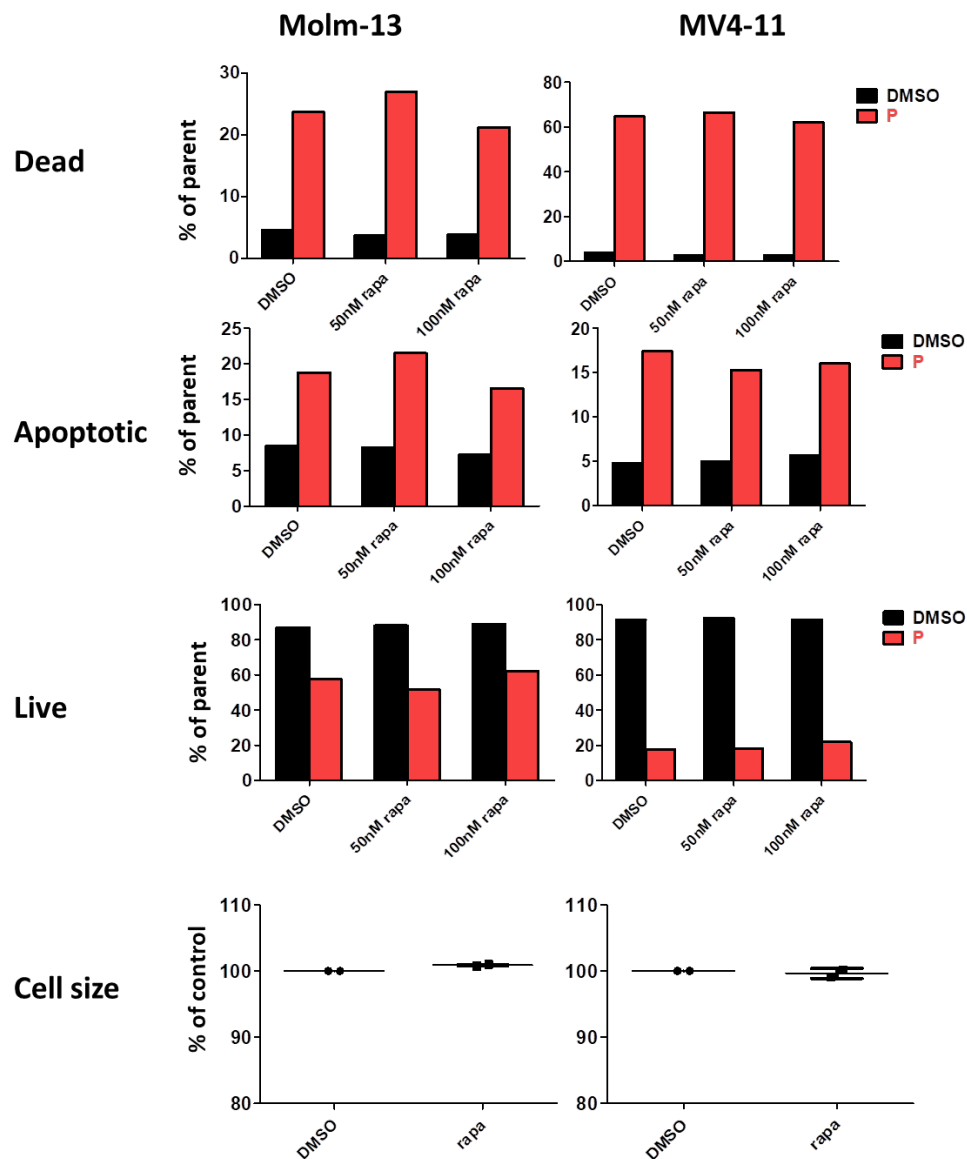

Supplement: mmc1.pdf [file mmc1.pdf]
